# Supplementary material
Source: PubMed Central journal article supplement (PMC3157176)
Supplement: mmc2.pdf [file mmc2.pdf]

## Supplemental Figure 2

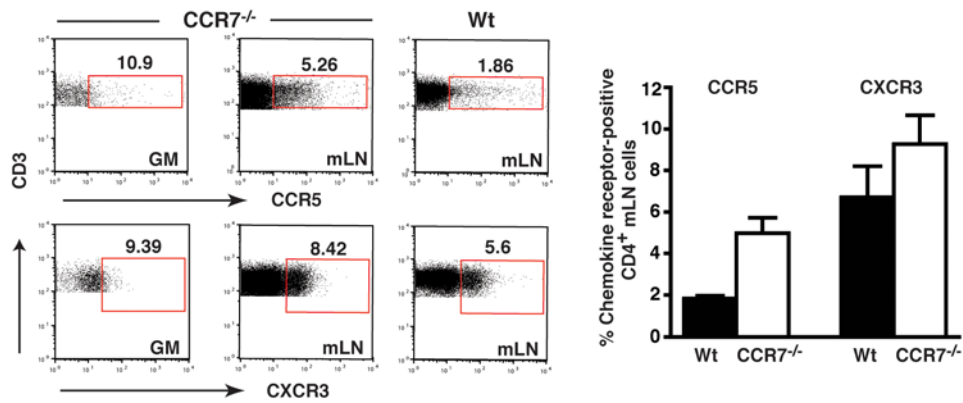

**Supplemental Figure 2. Enhanced expression of the Th1-associated chemokine receptors CCR5 and/or CXCR3 on GM- and mLN-derived T lymphocytes of CCR7<sup>-/-</sup> mice.** CD3<sup>+</sup> CD4<sup>+</sup>-gated T cells from gastric mucosa of CCR7<sup>-/-</sup> or from mLN of Wt and CCR7<sup>-/-</sup> mice (n=3 per group) were analysed for expression of CCR5 and CXCR3 (left panel). Percentages of CCR5<sup>+</sup> or CXCR3<sup>+</sup> CD4<sup>+</sup> T-cells are indicated and differences between age-matched Wt and CCR7<sup>-/-</sup> mLNs are shown (right panel). Bars represent means ± SEM.
