# Supplementary material
Source: PubMed Central journal article supplement (PMC3157176)
Supplement: mmc3.pdf [file mmc3.pdf]

### Supplemental Figure 3

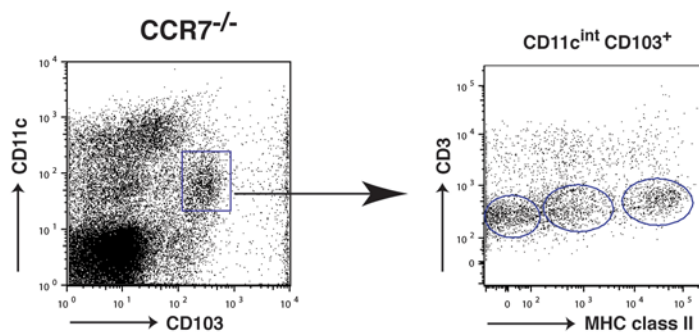

**Supplemental Figure 3. The CD11c<sup>int</sup>CD103<sup>+</sup> DC-like cell subpopulation in the GM of CCR7<sup>-/-</sup> mice was largely CD3<sup>-</sup> and expressed variable levels of MHC class II.** GM-derived leukocytes were stained for CD11c, CD103, CD3, and MHC class II expression. Cells were gated for CD11c<sup>int</sup> CD103<sup>+</sup> (left panel) and further analysed for CD3 and MHC class II expression (right panel). One representative dot plot is shown (n=4).
